# Supplementary material
Source: PubMed Central journal article supplement (PMC4212892)
Supplement: NIHMS636112-supplement-supplement_1.pdf [file NIHMS636112-supplement-supplement_1.pdf]

Online Supplementary Material A.

Multilingual naming test (MINT) items along with proportion correct responses for each item by monolinguals in English, bilinguals who received a perfect rating (i.e., 10 or “superior”) on the proficiency interview, and bilinguals in each self-rating category in English and Spanish.

| Item# | English   | Spanish              | ENGLISH         |                            |                       |              |                        |                      |              |                        | SPANISH                   |                       |              |                        |                      |              |                        |
|-------|-----------|----------------------|-----------------|----------------------------|-----------------------|--------------|------------------------|----------------------|--------------|------------------------|---------------------------|-----------------------|--------------|------------------------|----------------------|--------------|------------------------|
|       |           |                      | YOUNG BILINGUAL |                            |                       |              | OLDER BILINGUAL        |                      |              |                        | YOUNG BILINGUAL           |                       |              | OLDER BILINGUAL        |                      |              |                        |
|       |           |                      | mono<br>(n=36)  | biling<br>OPI=10<br>(n=13) | Eng-<br>dom<br>(n=35) | bal<br>(n=7) | Span-<br>dom<br>(n=10) | Eng-<br>dom<br>(n=7) | bal<br>(n=3) | Span-<br>dom<br>(n=10) | biling<br>OPI=10<br>(n=5) | Eng-<br>dom<br>(n=35) | bal<br>(n=7) | Span-<br>dom<br>(n=10) | Eng-<br>dom<br>(n=7) | bal<br>(n=3) | Span-<br>dom<br>(n=10) |
| 1     | hand      | mano                 | 1.00            | 1.00                       | 1.00                  | 1.00         | 1.00                   | 1.00                 | 1.00         | 1.00                   | 1.00                      | 1.00                  | 1.00         | 1.00                   | 1.00                 | 1.00         | 1.00                   |
| 2     | dog       | perro                | 1.00            | 1.00                       | 1.00                  | 1.00         | 1.00                   | 1.00                 | 1.00         | 1.00                   | 1.00                      | 0.97                  | 1.00         | 1.00                   | 1.00                 | 1.00         | 1.00                   |
| 3     | tree      | árbol                | 1.00            | 1.00                       | 1.00                  | 1.00         | 1.00                   | 1.00                 | 1.00         | 1.00                   | 1.00                      | 1.00                  | 1.00         | 1.00                   | 1.00                 | 1.00         | 1.00                   |
| 4     | bed       | cama                 | 1.00            | 1.00                       | 1.00                  | 1.00         | 1.00                   | 1.00                 | 1.00         | 1.00                   | 1.00                      | 1.00                  | 1.00         | 1.00                   | 1.00                 | 1.00         | 1.00                   |
| 5     | door      | puerta               | 1.00            | 1.00                       | 1.00                  | 1.00         | 1.00                   | 1.00                 | 1.00         | 1.00                   | 1.00                      | 1.00                  | 1.00         | 1.00                   | 1.00                 | 1.00         | 1.00                   |
| 6     | sun       | sol                  | 1.00            | 1.00                       | 1.00                  | 1.00         | 1.00                   | 1.00                 | 1.00         | 1.00                   | 1.00                      | 1.00                  | 1.00         | 1.00                   | 1.00                 | 1.00         | 1.00                   |
| 7     | book      | libro                | 1.00            | 1.00                       | 1.00                  | 1.00         | 1.00                   | 1.00                 | 1.00         | 1.00                   | 1.00                      | 1.00                  | 1.00         | 1.00                   | 0.86                 | 1.00         | 1.00                   |
| 8     | butterfly | mariposa             | 1.00            | 1.00                       | 1.00                  | 1.00         | 1.00                   | 1.00                 | 1.00         | 1.00                   | 1.00                      | 0.97                  | 1.00         | 1.00                   | 1.00                 | 1.00         | 1.00                   |
| 9     | scissors  | tijeras              | 1.00            | 1.00                       | 1.00                  | 1.00         | 1.00                   | 1.00                 | 1.00         | 1.00                   | 1.00                      | 0.94                  | 1.00         | 1.00                   | 1.00                 | 1.00         | 1.00                   |
| 10    | key       | llave                | 1.00            | 1.00                       | 1.00                  | 1.00         | 1.00                   | 1.00                 | 1.00         | 1.00                   | 1.00                      | 1.00                  | 1.00         | 1.00                   | 1.00                 | 1.00         | 1.00                   |
| 11    | chair     | silla                | 1.00            | 1.00                       | 1.00                  | 1.00         | 1.00                   | 1.00                 | 1.00         | 1.00                   | 1.00                      | 0.97                  | 1.00         | 1.00                   | 1.00                 | 1.00         | 1.00                   |
| 12    | moon      | luna                 | 1.00            | 1.00                       | 1.00                  | 1.00         | 1.00                   | 1.00                 | 1.00         | 1.00                   | 1.00                      | 1.00                  | 1.00         | 1.00                   | 1.00                 | 1.00         | 1.00                   |
| 13    | airplane  | avión<br>(aeroplano) | 1.00            | 1.00                       | 1.00                  | 1.00         | 0.90                   | 1.00                 | 1.00         | 1.00                   | 1.00                      | 0.91                  | 1.00         | 1.00                   | 0.86                 | 1.00         | 1.00                   |
| 14    | apple     | manzana              | 1.00            | 1.00                       | 1.00                  | 1.00         | 1.00                   | 1.00                 | 1.00         | 1.00                   | 1.00                      | 1.00                  | 1.00         | 1.00                   | 1.00                 | 1.00         | 1.00                   |
| 15    | fish      | pescado<br>(pez)     | 1.00            | 1.00                       | 1.00                  | 1.00         | 1.00                   | 1.00                 | 1.00         | 1.00                   | 1.00                      | 1.00                  | 1.00         | 1.00                   | 1.00                 | 1.00         | 1.00                   |
| 16    | grapes    | uvas                 | 1.00            | 1.00                       | 1.00                  | 1.00         | 1.00                   | 1.00                 | 1.00         | 1.00                   | 1.00                      | 1.00                  | 1.00         | 1.00                   | 1.00                 | 1.00         | 1.00                   |
| 17    | horse     | caballo              | 1.00            | 1.00                       | 1.00                  | 1.00         | 1.00                   | 1.00                 | 1.00         | 0.90                   | 1.00                      | 1.00                  | 1.00         | 1.00                   | 1.00                 | 1.00         | 1.00                   |
| 18    | drum      | tambor<br>(tambora)  | 1.00            | 1.00                       | 0.97                  | 1.00         | 1.00                   | 1.00                 | 1.00         | 0.80                   | 1.00                      | 0.77                  | 0.86         | 0.90                   | 0.86                 | 1.00         | 1.00                   |
| 19    | glove     | guante               | 1.00            | 1.00                       | 1.00                  | 1.00         | 1.00                   | 1.00                 | 1.00         | 1.00                   | 1.00                      | 0.89                  | 1.00         | 1.00                   | 1.00                 | 1.00         | 1.00                   |
| 20    | lightbulb | foco                 | 1.00            | 1.00                       | 1.00                  | 1.00         | 1.00                   | 1.00                 | 1.00         | 0.70                   | 0.80                      | 0.66                  | 0.86         | 1.00                   | 0.29                 | 0.67         | 1.00                   |
| 21    | cake      | pastel               | 1.00            | 1.00                       | 1.00                  | 1.00         | 1.00                   | 1.00                 | 1.00         | 1.00                   | 1.00                      | 0.97                  | 1.00         | 1.00                   | 0.86                 | 1.00         | 1.00                   |
| 22    | watch     | reloj                | 1.00            | 1.00                       | 1.00                  | 1.00         | 1.00                   | 1.00                 | 1.00         | 1.00                   | 1.00                      | 0.91                  | 1.00         | 1.00                   | 1.00                 | 1.00         | 1.00                   |
| 23    | bear      | oso                  | 1.00            | 1.00                       | 1.00                  | 1.00         | 1.00                   | 1.00                 | 1.00         | 0.90                   | 1.00                      | 1.00                  | 1.00         | 1.00                   | 1.00                 | 1.00         | 0.90                   |
| 24    | fork      | tenedor              | 1.00            | 1.00                       | 1.00                  | 1.00         | 1.00                   | 1.00                 | 1.00         | 0.90                   | 1.00                      | 0.94                  | 1.00         | 1.00                   | 1.00                 | 1.00         | 1.00                   |
| 25    | hat       | sombrero             | 1.00            | 1.00                       | 1.00                  | 1.00         | 1.00                   | 1.00                 | 1.00         | 1.00                   | 1.00                      | 0.66                  | 0.86         | 1.00                   | 1.00                 | 1.00         | 1.00                   |
| 26    | leaf      | hoja                 | 1.00            | 1.00                       | 1.00                  | 1.00         | 1.00                   | 1.00                 | 1.00         | 1.00                   | 1.00                      | 0.69                  | 1.00         | 1.00                   | 1.00                 | 1.00         | 1.00                   |
| 27    | tie       | corbata              | 1.00            | 1.00                       | 1.00                  | 1.00         | 1.00                   | 1.00                 | 1.00         | 0.90                   | 1.00                      | 0.77                  | 1.00         | 1.00                   | 1.00                 | 1.00         | 0.90                   |

|    |            |                                |      |      |      |      |      |      |      |      |      |      |      |      |      |      |      |
|----|------------|--------------------------------|------|------|------|------|------|------|------|------|------|------|------|------|------|------|------|
| 28 | candle     | vela<br>(candela,<br>veladora) | 1.00 | 1.00 | 0.97 | 1.00 | 1.00 | 1.00 | 1.00 | 0.90 | 0.80 | 0.89 | 1.00 | 1.00 | 0.71 | 1.00 | 1.00 |
| 29 | basket     | canasta<br>(canasto)           | 1.00 | 1.00 | 1.00 | 1.00 | 0.90 | 1.00 | 1.00 | 1.00 | 1.00 | 0.77 | 1.00 | 1.00 | 0.71 | 1.00 | 1.00 |
| 30 | clown      | payaso                         | 1.00 | 1.00 | 1.00 | 1.00 | 1.00 | 1.00 | 1.00 | 0.80 | 1.00 | 0.91 | 1.00 | 1.00 | 1.00 | 1.00 | 1.00 |
| 31 | kite       | papalote<br>(cometa)           | 1.00 | 1.00 | 1.00 | 1.00 | 0.90 | 1.00 | 1.00 | 0.70 | 0.80 | 0.43 | 0.57 | 0.90 | 0.29 | 1.00 | 0.90 |
| 32 | rainbow    | arco iris                      | 1.00 | 1.00 | 1.00 | 1.00 | 1.00 | 1.00 | 1.00 | 0.70 | 1.00 | 0.91 | 1.00 | 1.00 | 0.43 | 0.67 | 0.80 |
| 33 | witch      | bruja                          | 1.00 | 1.00 | 1.00 | 1.00 | 1.00 | 1.00 | 1.00 | 1.00 | 1.00 | 1.00 | 1.00 | 1.00 | 1.00 | 1.00 | 1.00 |
| 34 | seesaw     | subibaja<br>(columpio)         | 1.00 | 0.92 | 0.77 | 1.00 | 0.40 | 1.00 | 0.67 | 0.50 | 0.40 | 0.23 | 0.43 | 0.80 | 0.14 | 0.00 | 0.50 |
| 35 | flashlight | linterna                       | 1.00 | 1.00 | 1.00 | 1.00 | 0.80 | 1.00 | 1.00 | 0.80 | 0.80 | 0.17 | 0.00 | 0.60 | 0.00 | 0.00 | 0.50 |
| 36 | cloud      | nube                           | 1.00 | 1.00 | 1.00 | 1.00 | 1.00 | 1.00 | 1.00 | 0.90 | 1.00 | 0.91 | 1.00 | 1.00 | 0.71 | 1.00 | 1.00 |
| 37 | iron       | plancha                        | 1.00 | 1.00 | 1.00 | 1.00 | 1.00 | 1.00 | 1.00 | 0.90 | 1.00 | 0.97 | 1.00 | 1.00 | 1.00 | 1.00 | 1.00 |
| 38 | feather    | pluma                          | 1.00 | 1.00 | 1.00 | 1.00 | 0.90 | 1.00 | 1.00 | 0.90 | 1.00 | 0.80 | 1.00 | 0.90 | 0.86 | 0.67 | 0.90 |
| 39 | peacock    | pavo real                      | 1.00 | 1.00 | 0.80 | 0.86 | 0.40 | 0.86 | 0.67 | 0.70 | 1.00 | 0.37 | 0.43 | 0.70 | 0.00 | 0.33 | 0.60 |
| 40 | bridge     | punte                          | 1.00 | 1.00 | 1.00 | 1.00 | 1.00 | 1.00 | 1.00 | 0.90 | 1.00 | 0.80 | 0.71 | 0.90 | 0.86 | 1.00 | 1.00 |
| 41 | bone       | hueso                          | 1.00 | 1.00 | 1.00 | 1.00 | 1.00 | 1.00 | 1.00 | 1.00 | 1.00 | 1.00 | 1.00 | 1.00 | 1.00 | 1.00 | 1.00 |
| 42 | snail      | caracol                        | 1.00 | 1.00 | 1.00 | 1.00 | 1.00 | 0.86 | 0.67 | 0.70 | 1.00 | 0.37 | 0.43 | 0.70 | 0.29 | 1.00 | 0.80 |
| 43 | zipper     | zíper<br>(cierre)              | 1.00 | 1.00 | 1.00 | 1.00 | 1.00 | 1.00 | 1.00 | 1.00 | 1.00 | 0.63 | 0.86 | 1.00 | 0.00 | 0.33 | 1.00 |
| 44 | lock       | candado                        | 1.00 | 1.00 | 1.00 | 1.00 | 1.00 | 1.00 | 1.00 | 0.90 | 1.00 | 0.71 | 0.71 | 0.90 | 0.57 | 1.00 | 1.00 |
| 45 | whale      | ballena                        | 1.00 | 1.00 | 1.00 | 1.00 | 1.00 | 1.00 | 0.67 | 0.80 | 1.00 | 0.83 | 0.86 | 1.00 | 0.71 | 1.00 | 1.00 |
| 46 | nurse      | enfermera                      | 1.00 | 1.00 | 1.00 | 1.00 | 1.00 | 1.00 | 1.00 | 1.00 | 1.00 | 0.86 | 0.86 | 1.00 | 0.71 | 1.00 | 1.00 |
| 47 | cage       | jaula                          | 1.00 | 1.00 | 1.00 | 1.00 | 0.90 | 1.00 | 1.00 | 0.80 | 1.00 | 0.80 | 0.86 | 0.90 | 0.86 | 0.67 | 1.00 |
| 48 | arrow      | flecha                         | 1.00 | 1.00 | 1.00 | 1.00 | 0.90 | 1.00 | 0.67 | 0.90 | 0.80 | 0.54 | 0.43 | 1.00 | 0.57 | 1.00 | 0.90 |
| 49 | rake       | rastrillo                      | 1.00 | 1.00 | 0.94 | 1.00 | 0.30 | 1.00 | 1.00 | 0.40 | 0.40 | 0.11 | 0.00 | 0.30 | 0.86 | 1.00 | 0.70 |
| 50 | saw        | serrucho<br>(sierra)           | 1.00 | 1.00 | 0.97 | 0.86 | 0.70 | 1.00 | 1.00 | 0.70 | 1.00 | 0.26 | 0.43 | 0.80 | 0.86 | 1.00 | 1.00 |
| 51 | nest       | nido                           | 1.00 | 1.00 | 1.00 | 1.00 | 1.00 | 1.00 | 1.00 | 0.90 | 0.80 | 0.63 | 0.86 | 0.90 | 0.86 | 1.00 | 1.00 |
| 52 | plug       | enchufe                        | 0.97 | 0.77 | 0.86 | 0.71 | 0.90 | 1.00 | 0.67 | 0.70 | 0.80 | 0.63 | 0.71 | 1.00 | 0.29 | 0.33 | 0.30 |
| 53 | wig        | peluca                         | 1.00 | 1.00 | 1.00 | 1.00 | 0.90 | 1.00 | 1.00 | 0.70 | 0.80 | 0.83 | 0.86 | 0.90 | 0.57 | 0.67 | 0.80 |
| 54 | screw      | tornillo                       | 0.94 | 0.92 | 0.80 | 0.86 | 0.70 | 1.00 | 1.00 | 0.80 | 0.80 | 0.54 | 0.86 | 0.90 | 1.00 | 1.00 | 1.00 |
| 55 | king       | rey                            | 1.00 | 1.00 | 1.00 | 1.00 | 1.00 | 0.86 | 1.00 | 1.00 | 1.00 | 0.97 | 1.00 | 1.00 | 0.86 | 1.00 | 1.00 |
| 56 | scarf      | bufanda                        | 0.94 | 1.00 | 0.97 | 1.00 | 1.00 | 0.86 | 1.00 | 0.80 | 1.00 | 0.71 | 0.86 | 1.00 | 0.43 | 0.67 | 0.90 |
| 57 | well       | pozo                           | 1.00 | 1.00 | 0.97 | 1.00 | 0.80 | 1.00 | 1.00 | 0.70 | 1.00 | 0.31 | 0.71 | 0.80 | 0.43 | 1.00 | 0.90 |
| 58 | dustpan    | recogedor                      | 0.86 | 0.62 | 0.57 | 0.43 | 0.10 | 0.86 | 0.67 | 0.50 | 0.60 | 0.69 | 0.71 | 0.90 | 0.14 | 0.67 | 0.90 |
| 59 | parachute  | paracaídas                     | 1.00 | 1.00 | 0.97 | 1.00 | 1.00 | 1.00 | 0.67 | 0.90 | 0.80 | 0.46 | 0.43 | 0.70 | 0.43 | 0.33 | 0.80 |
| 60 | blind      | persiana                       | 1.00 | 1.00 | 0.89 | 1.00 | 1.00 | 1.00 | 1.00 | 0.80 | 0.60 | 0.31 | 0.43 | 0.40 | 0.29 | 0.33 | 0.90 |

*Assessing Language Dominance: the Multilingual Naming Test 47*

|    |                                    |                              |      |      |      |      |      |      |      |      |      |      |      |      |      |      |      |
|----|------------------------------------|------------------------------|------|------|------|------|------|------|------|------|------|------|------|------|------|------|------|
| 61 | hinge                              | bisagra                      | 0.92 | 0.69 | 0.69 | 0.43 | 0.20 | 0.71 | 0.67 | 0.40 | 0.20 | 0.03 | 0.00 | 0.10 | 0.00 | 0.33 | 0.50 |
| 62 | funnel                             | embudo                       | 0.94 | 0.85 | 0.86 | 0.71 | 0.30 | 0.86 | 0.67 | 0.60 | 0.60 | 0.06 | 0.14 | 0.30 | 0.29 | 0.67 | 0.90 |
| 63 | gauge<br>(barometer,<br>manometer) | medidor                      | 0.72 | 0.31 | 0.34 | 0.29 | 0.00 | 0.29 | 0.33 | 0.30 | 0.40 | 0.17 | 0.14 | 0.40 | 0.14 | 0.67 | 0.40 |
| 64 | porthole                           | portilla                     | 0.33 | 0.08 | 0.11 | 0.00 | 0.00 | 0.57 | 0.67 | 0.20 | 0.00 | 0.00 | 0.00 | 0.00 | 0.00 | 0.00 | 0.00 |
| 65 | anvil                              | yunque                       | 0.67 | 0.85 | 0.43 | 0.57 | 0.10 | 0.29 | 0.33 | 0.10 | 0.20 | 0.00 | 0.00 | 0.20 | 0.00 | 0.00 | 0.20 |
| 66 | mortar                             | molcajete<br>(mortero)       | 0.44 | 0.31 | 0.09 | 0.29 | 0.10 | 0.29 | 0.00 | 0.30 | 0.80 | 0.51 | 0.14 | 0.50 | 0.57 | 0.33 | 0.70 |
| 67 | pestle                             | mano de<br>mortero<br>(mano) | 0.36 | 0.31 | 0.06 | 0.29 | 0.00 | 0.17 | 0.00 | 0.10 | 0.20 | 0.00 | 0.00 | 0.00 | 0.00 | 0.00 | 0.10 |
| 68 | axle                               | eje                          | 0.78 | 0.62 | 0.46 | 0.43 | 0.10 | 1.00 | 0.67 | 0.30 | 0.20 | 0.00 | 0.14 | 0.00 | 0.00 | 0.33 | 0.40 |

## Online Supplementary Material B.

Boston Naming Test (BNT) items along with proportion correct responses for each item by monolinguals in English, bilinguals who received a perfect rating (i.e., 10 or “superior”) on the proficiency interview, and bilinguals in each self-rating category in English and Spanish.

| Item# | English    | Spanish                                | ENGLISH        |                        |                       |                 |                        | SPANISH                   |                       |              |                        |  |
|-------|------------|----------------------------------------|----------------|------------------------|-----------------------|-----------------|------------------------|---------------------------|-----------------------|--------------|------------------------|--|
|       |            |                                        | mono<br>(n=36) | biling<br>OPI=10(n=11) | Eng-<br>dom<br>(n=35) | YOUNG BILINGUAL |                        | biling<br>OPI=10<br>(n=2) | Eng-<br>dom<br>(n=35) | bal<br>(n=7) | Span-<br>dom<br>(n=10) |  |
|       |            |                                        |                |                        |                       | bal<br>(n=7)    | Span-<br>dom<br>(n=10) |                           |                       |              |                        |  |
| 1     | bed        | cama                                   | 1.00           | 1.00                   | 1.00                  | 1.00            | 1.00                   | 1.00                      | 1.00                  | 1.00         | 1.00                   |  |
| 2     | tree       | árbol                                  | 1.00           | 1.00                   | 1.00                  | 1.00            | 1.00                   | 1.00                      | 1.00                  | 1.00         | 1.00                   |  |
| 3     | pencil     | lápiz                                  | 1.00           | 1.00                   | 1.00                  | 1.00            | 1.00                   | 1.00                      | 1.00                  | 1.00         | 1.00                   |  |
| 4     | house      | casa                                   | 1.00           | 1.00                   | 1.00                  | 1.00            | 1.00                   | 1.00                      | 1.00                  | 1.00         | 1.00                   |  |
| 5     | whistle    | silbato (pito)                         | 1.00           | 1.00                   | 1.00                  | 1.00            | 0.90                   | 0.50                      | 0.34                  | 0.29         | 0.90                   |  |
| 6     | scissors   | tijeras                                | 1.00           | 1.00                   | 1.00                  | 1.00            | 1.00                   | 1.00                      | 0.94                  | 1.00         | 1.00                   |  |
| 7     | comb       | peine                                  | 1.00           | 1.00                   | 0.97                  | 1.00            | 1.00                   | 1.00                      | 0.69                  | 1.00         | 1.00                   |  |
| 8     | flower     | flor                                   | 1.00           | 1.00                   | 1.00                  | 1.00            | 1.00                   | 1.00                      | 0.97                  | 1.00         | 1.00                   |  |
| 9     | saw        | serrucho (sierra)                      | 1.00           | 1.00                   | 0.97                  | 1.00            | 0.80                   | 0.50                      | 0.23                  | 0.43         | 0.90                   |  |
| 10    | toothbrush | cepillo de dientes                     | 0.97           | 1.00                   | 1.00                  | 1.00            | 1.00                   | 1.00                      | 0.91                  | 0.86         | 1.00                   |  |
| 11    | helicopter | helicóptero                            | 1.00           | 1.00                   | 1.00                  | 1.00            | 1.00                   | 1.00                      | 0.97                  | 1.00         | 1.00                   |  |
| 12    | broom      | escoba                                 | 1.00           | 1.00                   | 0.97                  | 1.00            | 1.00                   | 1.00                      | 0.80                  | 1.00         | 1.00                   |  |
| 13    | octopus    | pulpo                                  | 0.97           | 1.00                   | 1.00                  | 1.00            | 1.00                   | 1.00                      | 0.54                  | 0.57         | 0.70                   |  |
| 14    | mushroom   | hongo (champiñón)                      | 1.00           | 1.00                   | 1.00                  | 1.00            | 1.00                   | 1.00                      | 0.80                  | 0.86         | 1.00                   |  |
| 15    | hanger     | gancho (percha,<br>colgador)           | 1.00           | 1.00                   | 1.00                  | 1.00            | 1.00                   | 1.00                      | 0.71                  | 1.00         | 1.00                   |  |
| 16    | wheelchair | silla de ruedas                        | 1.00           | 1.00                   | 1.00                  | 1.00            | 1.00                   | 1.00                      | 0.89                  | 0.86         | 1.00                   |  |
| 17    | camel      | camello                                | 1.00           | 1.00                   | 1.00                  | 1.00            | 1.00                   | 1.00                      | 0.71                  | 0.86         | 1.00                   |  |
| 18    | mask       | máscara                                | 1.00           | 1.00                   | 1.00                  | 1.00            | 1.00                   | 1.00                      | 1.00                  | 1.00         | 1.00                   |  |
| 19    | pretzel    | pretzel                                | 1.00           | 1.00                   | 1.00                  | 1.00            | 1.00                   | 0.00                      | 0.29                  | 0.29         | 0.40                   |  |
| 20    | bench      | banca (banco)                          | 1.00           | 1.00                   | 1.00                  | 1.00            | 0.80                   | 1.00                      | 0.74                  | 1.00         | 0.90                   |  |
| 21    | racquet    | raqueta                                | 1.00           | 1.00                   | 1.00                  | 1.00            | 0.90                   | 1.00                      | 0.71                  | 1.00         | 1.00                   |  |
| 22    | snail      | caracol                                | 1.00           | 1.00                   | 1.00                  | 1.00            | 0.90                   | 1.00                      | 0.43                  | 0.43         | 0.70                   |  |
| 23    | volcano    | volcán                                 | 1.00           | 1.00                   | 1.00                  | 1.00            | 1.00                   | 1.00                      | 0.69                  | 0.57         | 0.80                   |  |
| 24    | seahorse   | caballo de mar<br>(caballito de/l mar) | 0.97           | 1.00                   | 0.97                  | 0.86            | 0.90                   | 1.00                      | 0.63                  | 0.57         | 0.90                   |  |
| 25    | dart       | dardo                                  | 0.97           | 1.00                   | 0.89                  | 1.00            | 0.60                   | 1.00                      | 0.17                  | 0.29         | 0.50                   |  |
| 26    | canoe      | canoa                                  | 1.00           | 1.00                   | 0.91                  | 1.00            | 0.90                   | 1.00                      | 0.43                  | 0.71         | 0.70                   |  |

|    |                       |                    |      |      |      |      |      |      |      |      |      |
|----|-----------------------|--------------------|------|------|------|------|------|------|------|------|------|
| 27 | globe                 | globo              | 1.00 | 1.00 | 0.97 | 1.00 | 0.70 | 0.50 | 0.46 | 0.57 | 0.70 |
| 28 | wreath                | corona             | 0.92 | 0.73 | 0.69 | 0.71 | 0.10 | 0.00 | 0.03 | 0.00 | 0.60 |
| 29 | beaver                | castor             | 0.97 | 0.91 | 0.77 | 1.00 | 0.80 | 1.00 | 0.06 | 0.00 | 0.40 |
| 30 | harmonica             | armónica           | 0.97 | 1.00 | 0.80 | 0.86 | 0.80 | 1.00 | 0.66 | 0.71 | 0.80 |
| 31 | rhinoceros<br>(rhino) | rinoceronte        | 0.97 | 1.00 | 0.97 | 1.00 | 0.90 | 1.00 | 0.46 | 0.71 | 0.80 |
| 32 | acorn                 | bellota            | 1.00 | 0.82 | 0.77 | 0.71 | 0.50 | 0.00 | 0.06 | 0.00 | 0.10 |
| 33 | igloo                 | iglú               | 1.00 | 1.00 | 0.97 | 1.00 | 1.00 | 1.00 | 0.54 | 0.71 | 0.90 |
| 34 | stilts                | zancos             | 1.00 | 0.91 | 0.71 | 0.57 | 0.20 | 0.00 | 0.00 | 0.14 | 0.30 |
| 35 | dominoes              | dominó (dómino)    | 1.00 | 0.91 | 0.97 | 1.00 | 1.00 | 1.00 | 0.89 | 1.00 | 1.00 |
| 36 | cactus                | cactus             | 1.00 | 1.00 | 1.00 | 1.00 | 1.00 | 0.50 | 0.46 | 0.43 | 0.90 |
| 37 | escalator             | escalera electrica | 1.00 | 0.82 | 0.89 | 0.86 | 0.40 | 1.00 | 0.20 | 0.14 | 0.50 |
| 38 | harp                  | arpa               | 0.97 | 0.91 | 0.80 | 0.86 | 0.90 | 1.00 | 0.60 | 0.86 | 1.00 |
| 39 | hammock               | hamaca             | 0.94 | 0.82 | 0.80 | 0.43 | 0.50 | 1.00 | 0.51 | 0.71 | 0.80 |
| 40 | knocker               | aldaba             | 0.86 | 0.73 | 0.43 | 0.43 | 0.10 | 0.00 | 0.00 | 0.00 | 0.00 |
| 41 | pelican               | pelícano           | 0.92 | 0.91 | 0.80 | 0.86 | 0.60 | 1.00 | 0.31 | 0.29 | 0.60 |
| 42 | stethoscope           | estetoscopio       | 0.86 | 0.64 | 0.60 | 0.57 | 0.20 | 1.00 | 0.11 | 0.29 | 0.40 |
| 43 | pyramid               | piramide           | 1.00 | 1.00 | 1.00 | 1.00 | 1.00 | 1.00 | 0.77 | 1.00 | 1.00 |
| 44 | muzzle                | bozal              | 0.86 | 0.73 | 0.60 | 0.71 | 0.30 | 0.00 | 0.06 | 0.14 | 0.20 |
| 45 | unicorn               | unicornio          | 1.00 | 1.00 | 1.00 | 1.00 | 0.90 | 1.00 | 0.57 | 0.86 | 1.00 |
| 46 | funnel                | embudo             | 0.94 | 0.82 | 0.83 | 0.71 | 0.40 | 0.00 | 0.09 | 0.14 | 0.20 |
| 47 | accordion             | acordeón           | 0.83 | 0.64 | 0.63 | 0.86 | 0.50 | 0.00 | 0.54 | 0.71 | 0.70 |
| 48 | noose                 | soga               | 0.89 | 0.82 | 0.60 | 1.00 | 0.50 | 0.50 | 0.17 | 0.29 | 0.40 |
| 49 | asparagus             | esparrago          | 0.97 | 1.00 | 0.89 | 0.86 | 0.80 | 1.00 | 0.49 | 0.57 | 0.80 |
| 50 | compass               | compás             | 0.53 | 0.55 | 0.54 | 0.57 | 0.40 | 0.50 | 0.20 | 0.14 | 0.50 |
| 51 | latch                 | picaporte          | 0.47 | 0.36 | 0.29 | 0.29 | 0.00 | 0.00 | 0.00 | 0.00 | 0.20 |
| 52 | tripod                | tripie             | 0.94 | 0.82 | 0.74 | 0.57 | 0.40 | 0.50 | 0.03 | 0.14 | 0.30 |
| 53 | scroll                | pergamino          | 0.86 | 0.82 | 0.71 | 1.00 | 0.20 | 0.00 | 0.06 | 0.00 | 0.30 |
| 54 | tongs                 | pinzas (tenazas)   | 0.75 | 0.64 | 0.40 | 0.57 | 0.10 | 1.00 | 0.31 | 0.14 | 0.80 |
| 55 | sphinx                | esfinge            | 0.58 | 0.91 | 0.51 | 0.57 | 0.40 | 0.50 | 0.09 | 0.14 | 0.30 |
| 56 | yoke                  | yugo               | 0.22 | 0.00 | 0.06 | 0.00 | 0.00 | 0.00 | 0.00 | 0.00 | 0.10 |
| 57 | trellis, lattice      | enrejado           | 0.14 | 0.00 | 0.06 | 0.00 | 0.00 | 0.00 | 0.00 | 0.00 | 0.00 |
| 58 | palette               | paleta             | 0.44 | 0.55 | 0.51 | 0.43 | 0.20 | 0.00 | 0.06 | 0.29 | 0.20 |
| 59 | protractor            | transportador      | 0.72 | 0.55 | 0.54 | 0.71 | 0.40 | 0.00 | 0.03 | 0.00 | 0.30 |
| 60 | abacus                | ábaco              | 0.50 | 0.27 | 0.31 | 0.14 | 0.40 | 0.50 | 0.11 | 0.14 | 0.30 |
